# Supplementary material
Source: HighWire-hosted journal article supplement (https://www.cmaj.ca/highwire/filestream/59494/field_highwire_adjunct_files/1/150632-res-2-at.pdf)
Supplement: 150632-res-2-at.pdf [file 150632-res-2-at.pdf]

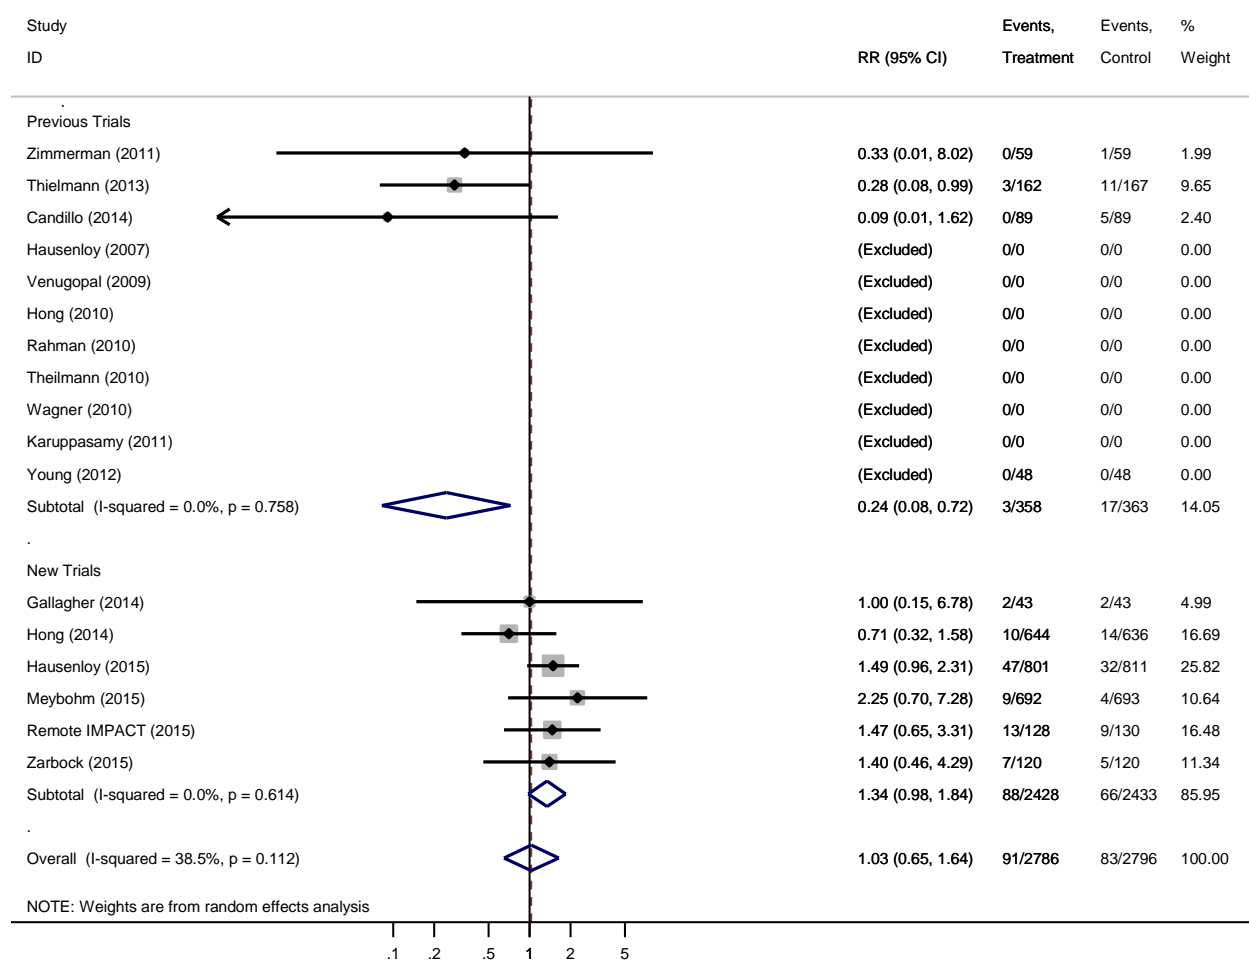

Appendix 2 (as supplied by the authors). Updated results of Brevoord et al<sup>1</sup> and Healy et al<sup>2</sup> meta-analysis of cardiovascular surgery patients undergoing remote ischemic preconditioning compared to control on the outcome of mortality. Trials with no events in either group were excluded from this analysis.

## References

1. Brevoord D, Kranke P, Kuijpers M, et al. Remote ischemic conditioning to protect against ischemia-reperfusion injury: a systematic review and meta-analysis. *PLoS ONE* 2012;7:e42179.
2. Remote Preconditioning Trialists' Group, Healy DA, Khan WA, Wong CS, et al. Remote preconditioning and major clinical complications following adult cardiovascular surgery: systematic review and meta-analysis. *Int J Cardiol* 2014;176:20-31.
